# Supplementary material for: Markers of Cardiovascular Disease among Adults Exposed to Smoke from the Hazelwood Coal Mine Fire
Source: PubMed Central journal article supplement (PMC7914645; doi:10.3390/ijerph18041587), 2021-02-08
Supplement: ijerph-18-01587-s001.pdf [file ijerph-18-01587-s001.pdf]

## Markers of cardiovascular disease among adults exposed to smoke from the Hazelwood coal mine fire.

### Supplementary Material

**Table S1 Laboratory Methods**

| <b>Clinical Biochemistry Methods</b>        |                                                                                                                                                                              |                             |
|---------------------------------------------|------------------------------------------------------------------------------------------------------------------------------------------------------------------------------|-----------------------------|
| <b>Test Name</b>                            | <b>Method</b>                                                                                                                                                                | <b>Instrument</b>           |
| High sensitivity C-reactive protein         | Immunoturbidimetric                                                                                                                                                          | Abbott Archicentre ci 16200 |
| Creatinine, enzymatic                       | Enzymatic                                                                                                                                                                    |                             |
| Cholesterol                                 | Enzymatic                                                                                                                                                                    |                             |
| Triglycerides                               | Glycerol Phosphate Oxidase                                                                                                                                                   |                             |
| Cholesterol, high-density lipoprotein (HDL) | Accelerator Selective Detergent                                                                                                                                              |                             |
| Cholesterol, low-density lipoprotein (LDL)  | LDL was not measured directly but calculated using the Friedewald formula: $LDLC = (total\ CHOL) - (HDLC) - (TG/2.2)$ . This formula cannot be used where $TG > 4.5$ mmol/L. |                             |
| Estimated glomerular filtration rate (eGFR) | eGFR was not measured directly but was calculated using the creatinine result, gender and age as per the CKD-EPI formula                                                     |                             |
| High sensitivity troponin I                 | Chemiluminescent Microparticle Immunoassay                                                                                                                                   |                             |
| N-terminal pro B-type natriuretic peptide   | Electrochemiluminescence Immunoassay                                                                                                                                         | Roche e411                  |
| Haemoglobin A1c                             | Borunate Affinity HPLC                                                                                                                                                       | Trinity Premier Hb9210      |
| <b>Haematology Methods</b>                  |                                                                                                                                                                              |                             |
| <b>Test Name</b>                            | <b>Method</b>                                                                                                                                                                | <b>Instrument</b>           |
| Fibrinogen                                  | Von Clauss                                                                                                                                                                   | Stago STA-R Max2            |

**Table S2 Cardiovascular questionnaire**

|                                                                                                                                                                                                          |                   |
|----------------------------------------------------------------------------------------------------------------------------------------------------------------------------------------------------------|-------------------|
| 1. Have you ever been told by a doctor that you have any of the following conditions?                                                                                                                    |                   |
| High blood pressure / hypertension                                                                                                                                                                       | Yes/No            |
| If yes, year of diagnosis or first episode:                                                                                                                                                              |                   |
| High blood cholesterol                                                                                                                                                                                   | Yes/No            |
| If yes, year of diagnosis or first episode:                                                                                                                                                              |                   |
| Atrial Fibrillation                                                                                                                                                                                      | Yes/No            |
| If yes, year of diagnosis or first episode:                                                                                                                                                              |                   |
| Apart from Atrial Fibrillation, any other irregular heart beat / arrhythmia / palpitation. E.g. heart is out of its normal rhythm, skipped a beat, added a beat, is 'fluttering', or is beating too fast | Yes/No            |
| If yes, year of diagnosis or first episode:                                                                                                                                                              |                   |
| Anuerysm ie. a localised bulge of a blood vessel, caused by disease or weakening of the vessel wall                                                                                                      | Yes/No            |
| If yes, year of diagnosis or first episode:                                                                                                                                                              |                   |
| Heart valve disease ie. damage or defect in one of the heart valves                                                                                                                                      | Yes/No            |
| If yes, year of diagnosis or first episode:                                                                                                                                                              |                   |
| Heart failure ie. heart is failing to pump sufficient blood throughout the body                                                                                                                          | Yes/No            |
| If yes, year of diagnosis or first episode:                                                                                                                                                              |                   |
| Heart attack / Myocardial infarction                                                                                                                                                                     | Yes/No            |
| If yes, year of diagnosis or first episode:                                                                                                                                                              |                   |
| Coronary artery disease or atherosclerosis ie. build-up of plaque in the artery wall that can lead to blockage of the artery                                                                             | Yes/No            |
| If yes, year of diagnosis or first episode:                                                                                                                                                              |                   |
| Stroke / Mini stroke / TIA ie. interruption of blood flow to the brain                                                                                                                                   | Yes/No            |
| If yes, year of diagnosis or first episode:                                                                                                                                                              |                   |
| Vascular disease ie. restriction of blood flow to the arms, legs, hands, or feet.                                                                                                                        | Yes/No            |
| If yes, year of diagnosis or first episode:                                                                                                                                                              |                   |
| If yes, please specify _____                                                                                                                                                                             |                   |
| Diabetes type 2 ie. usually called non-insulin-dependent, or adult-onset                                                                                                                                 | Yes/No            |
| If yes, year of diagnosis or first episode:                                                                                                                                                              |                   |
| <i>To properly evaluate your heart health it is important to know about your family history.</i>                                                                                                         |                   |
| 2. Did any of your close relatives suffer from any of the following conditions/events before the age of 60 years?<br>A close relative includes: parents, brothers, sisters.                              |                   |
| Heart attack / Myocardial infarction                                                                                                                                                                     | Yes/Don't know/No |
| If yes, do you know the estimate age at first diagnosis?                                                                                                                                                 | Yes/No            |
| If yes, estimate age at first diagnosis:                                                                                                                                                                 |                   |

|                                                                                                                                       |                                                                                                                                                                                                                                                                  |
|---------------------------------------------------------------------------------------------------------------------------------------|------------------------------------------------------------------------------------------------------------------------------------------------------------------------------------------------------------------------------------------------------------------|
| Coronary artery disease or atherosclerosis ie. build-up of plaque in the artery wall that can lead to blockage of the artery          | Yes/Don't know/No                                                                                                                                                                                                                                                |
| If yes, do you know the estimate age at first diagnosis?                                                                              | Yes/No                                                                                                                                                                                                                                                           |
| If yes, estimate age at first diagnosis:                                                                                              |                                                                                                                                                                                                                                                                  |
| Stroke / Mini stroke / TIA ie. Interruption of blood flow to the brain                                                                | Yes/Don't know/No                                                                                                                                                                                                                                                |
| If yes, do you know the estimate age at first diagnosis?                                                                              | Yes/No                                                                                                                                                                                                                                                           |
| If yes, estimate age at first diagnosis:                                                                                              |                                                                                                                                                                                                                                                                  |
| Vascular disease ie. restriction of blood flow to the arms, legs, hands or feet.                                                      | Yes/Don't know/No                                                                                                                                                                                                                                                |
| If yes, please specify _____                                                                                                          |                                                                                                                                                                                                                                                                  |
| If yes, do you know the estimate age at first diagnosis?                                                                              | Yes/No                                                                                                                                                                                                                                                           |
| If yes, estimate age at first diagnosis:                                                                                              |                                                                                                                                                                                                                                                                  |
| Diabetes type 2 ie. usually called non-insulin-dependent, or adult-onset                                                              | Yes/Don't know/No                                                                                                                                                                                                                                                |
| If yes, do you know the estimate age at first diagnosis?                                                                              | Yes/No                                                                                                                                                                                                                                                           |
| If yes, estimate age at first diagnosis:                                                                                              |                                                                                                                                                                                                                                                                  |
| <i>To properly evaluate your cardiovascular health it is important to know about your smoking history and other exposure to smoke</i> |                                                                                                                                                                                                                                                                  |
| 3. Have you smoked at least 100 cigarettes, or a similar amount of tobacco, in your entire lifetime?                                  | Yes/No                                                                                                                                                                                                                                                           |
| If yes, which one of the following best describes your smoking status?                                                                | <input type="radio"/> You currently smoke daily?<br><input type="radio"/> You currently smoke at least weekly, but not daily?<br><input type="radio"/> You currently smoke less often than weekly?<br><input type="radio"/> You don't smoke now but you used to? |
| At which age did you last stop smoking?                                                                                               |                                                                                                                                                                                                                                                                  |
| For how many years in total have you smoked? (if stopped and started, add smoking periods together)                                   |                                                                                                                                                                                                                                                                  |
| Over those years, what is the average number of cigarettes that you have smoked per day, or if less than daily, per week or month?    |                                                                                                                                                                                                                                                                  |
| Please state period (per day, per week, or per month)                                                                                 | <input type="radio"/> Per day<br><input type="radio"/> Per week<br><input type="radio"/> Per month                                                                                                                                                               |
| 4. Have you been exposed to tobacco smoke on most days and nights in the last 12 months?                                              | Yes/No                                                                                                                                                                                                                                                           |
| If yes, Not counting yourself, how many people in your household smoke regularly?                                                     |                                                                                                                                                                                                                                                                  |
| Where do they usually smoke?                                                                                                          | <input type="radio"/> Inside the house                                                                                                                                                                                                                           |

|                                                                                                                                                                                                                                                                                                                                                                                                                                                                                        |                                                                                                                                                                                                                                            |
|----------------------------------------------------------------------------------------------------------------------------------------------------------------------------------------------------------------------------------------------------------------------------------------------------------------------------------------------------------------------------------------------------------------------------------------------------------------------------------------|--------------------------------------------------------------------------------------------------------------------------------------------------------------------------------------------------------------------------------------------|
|                                                                                                                                                                                                                                                                                                                                                                                                                                                                                        | <input type="radio"/> Outside the house<br><input type="radio"/> Both inside and outside the house                                                                                                                                         |
| <p><i>Because alcohol use can affect health and interfere with certain medications and treatments, it is important that we ask you questions about your use of alcohol. Your answers will remain confidential, so please be as accurate as possible. Try to answer the questions in terms of 'standard drinks'.</i></p>                                                                                                                                                                |                                                                                                                                                                                                                                            |
| <p>5. How often did you have a drink containing alcohol in the past year?</p>                                                                                                                                                                                                                                                                                                                                                                                                          | <input type="radio"/> Never → move to question 6<br><input type="radio"/> Monthly or less<br><input type="radio"/> 2 to 4 times per month<br><input type="radio"/> 2 to 3 times per week<br><input type="radio"/> 4 or more times per week |
| <p>How many drinks did you have on a typical day when you were drinking in the past year?</p>                                                                                                                                                                                                                                                                                                                                                                                          | <input type="radio"/> 1 or 2<br><input type="radio"/> 3 or 4<br><input type="radio"/> 5 or 6<br><input type="radio"/> 7 to 9<br><input type="radio"/> 10 or more                                                                           |
| <p>How often did you have 6 or more drinks on one occasion during the past year?</p>                                                                                                                                                                                                                                                                                                                                                                                                   | <input type="radio"/> Never<br><input type="radio"/> Less than monthly<br><input type="radio"/> Monthly<br><input type="radio"/> Weekly<br><input type="radio"/> Daily or almost daily                                                     |
| <p><i>To properly evaluate your heart, it is important to know about your physical activity. The questions start with vigorous activity and end with sitting. The first question is about vigorous activity. Vigorous activity requires a large amount of effort and causes rapid breathing and a large increase in your heart rate. (Examples: running, fast cycling, aerobics, fast swimming, heavy shovelling or digging ditches, carrying / moving heavy loads (&gt;20kg))</i></p> |                                                                                                                                                                                                                                            |
| <p>6. During the last 7 days, did you do any vigorous physical activity for at least 10 minutes at a time?</p>                                                                                                                                                                                                                                                                                                                                                                         | Yes/ No                                                                                                                                                                                                                                    |
| <p>If yes, how many days per week did you do vigorous activity?</p>                                                                                                                                                                                                                                                                                                                                                                                                                    |                                                                                                                                                                                                                                            |
| <p><i>These questions are about moderate activity. Moderate activity requires a moderate amount of effort and noticeably increases your heart rate. (examples: brisk walking, dancing, gardening, housework or domestic chores, active involvement in games and sports with children/walking domestic animals, general building tasks (eg roofing, painting), carrying / moving moderate loads (&lt;20kg)</i></p>                                                                      |                                                                                                                                                                                                                                            |
| <p>7. During the last 7 days, did you do any moderate physical activity for at least 10 minutes at a time?</p>                                                                                                                                                                                                                                                                                                                                                                         | Yes/No                                                                                                                                                                                                                                     |
| <p>If yes, how many days per week did you do moderate activity?</p>                                                                                                                                                                                                                                                                                                                                                                                                                    |                                                                                                                                                                                                                                            |

|                                                                                                                                                                                                                                                                                                                                                         |                                                                                                                                                                                                                                                                                                                                                                                                |
|---------------------------------------------------------------------------------------------------------------------------------------------------------------------------------------------------------------------------------------------------------------------------------------------------------------------------------------------------------|------------------------------------------------------------------------------------------------------------------------------------------------------------------------------------------------------------------------------------------------------------------------------------------------------------------------------------------------------------------------------------------------|
| How many minutes per day did you do moderate activity?                                                                                                                                                                                                                                                                                                  |                                                                                                                                                                                                                                                                                                                                                                                                |
| <i>The next questions are about walking (examples: walking to the shops or to the end of the street)</i>                                                                                                                                                                                                                                                |                                                                                                                                                                                                                                                                                                                                                                                                |
| 8. During the last 7 days, did you do any walking for at least 10 minutes at a time?                                                                                                                                                                                                                                                                    | Yes/No                                                                                                                                                                                                                                                                                                                                                                                         |
| If yes, how many days per week did you walk for at least 10 minutes?                                                                                                                                                                                                                                                                                    |                                                                                                                                                                                                                                                                                                                                                                                                |
| How many minutes per day did you walk for at least 10 minutes at a time?                                                                                                                                                                                                                                                                                |                                                                                                                                                                                                                                                                                                                                                                                                |
| <i>This question is about activities you did over the 7 days while sitting or lying down. Don't count the time you spent in bed. For each of the activities only count the time when this was your main activity. For examples if you are watching television and doing a crossword, count it as television time or crossword time but not as both.</i> |                                                                                                                                                                                                                                                                                                                                                                                                |
| 9. During the last 7 days, how much time in total did you spend sitting or lying down and ...                                                                                                                                                                                                                                                           |                                                                                                                                                                                                                                                                                                                                                                                                |
| Watching television or videos/DVDs                                                                                                                                                                                                                                                                                                                      |                                                                                                                                                                                                                                                                                                                                                                                                |
| Using the computer / internet                                                                                                                                                                                                                                                                                                                           |                                                                                                                                                                                                                                                                                                                                                                                                |
| Reading                                                                                                                                                                                                                                                                                                                                                 |                                                                                                                                                                                                                                                                                                                                                                                                |
| Doing hobbies, e.g. craft, crosswords                                                                                                                                                                                                                                                                                                                   |                                                                                                                                                                                                                                                                                                                                                                                                |
| Socializing with friends or family                                                                                                                                                                                                                                                                                                                      |                                                                                                                                                                                                                                                                                                                                                                                                |
| Driving or riding in a car, or time on public transport                                                                                                                                                                                                                                                                                                 |                                                                                                                                                                                                                                                                                                                                                                                                |
| 10. Which if these best describes you current employment status?                                                                                                                                                                                                                                                                                        | <input type="radio"/> Self employed<br><input type="radio"/> Employed full-time<br><input type="radio"/> Employed part-time or casual<br><input type="radio"/> Unemployed<br><input type="radio"/> A student<br><input type="radio"/> Engaged in home duties<br><input type="radio"/> Retired<br><input type="radio"/> Unable to work<br><input type="radio"/> Other (please specify _____)    |
| 11. Which ethnic (ancestry) group do you consider yourself to be part of?                                                                                                                                                                                                                                                                               | <input type="radio"/> Caucasian/ White<br><input type="radio"/> Aboriginal / Torres Strait Islander<br><input type="radio"/> Asian<br><input type="radio"/> Polynesian/Melanesian/Maori<br><input type="radio"/> North African / Middle Eastern<br><input type="radio"/> Black African<br><input type="radio"/> Central / South American<br><input type="radio"/> Other (please specify _____) |

**Table S3 Medications and corresponding ATC Codes used in the analysis**

| <b>Medication Group</b>                  | <b>ATC Codes</b>                                                                                                                                                                                                                                                                                                                                                                                                                                                                                                                                                                                                                                                                                                                                                                                                                                                  |
|------------------------------------------|-------------------------------------------------------------------------------------------------------------------------------------------------------------------------------------------------------------------------------------------------------------------------------------------------------------------------------------------------------------------------------------------------------------------------------------------------------------------------------------------------------------------------------------------------------------------------------------------------------------------------------------------------------------------------------------------------------------------------------------------------------------------------------------------------------------------------------------------------------------------|
| <b>Antihypertensive medications</b>      |                                                                                                                                                                                                                                                                                                                                                                                                                                                                                                                                                                                                                                                                                                                                                                                                                                                                   |
| Diuretics                                | Thiazides: C03EA14, C03BA04, C03BA03, C03AA03, C03BA11, C03BA08, C03BA02, C03BA10. Loop diuretics: C03CA02, C03CX01, C03CA01, C03CA03, C03CA04.                                                                                                                                                                                                                                                                                                                                                                                                                                                                                                                                                                                                                                                                                                                   |
| Beta blocking agents                     | Selective: C07AB04, C07AB03, C07AB05, C07AB07, C07AB08, C07AB02, C07AB12, C07AB13. Non-selective: C07AA01, C07AA19, C07AA30, C07AA15, C07AA14, C07AA18, C07AA12, C07AA02, C07AA23, C07AA03, C07AA05. Alpha and beta blocking agents: C07AG02.                                                                                                                                                                                                                                                                                                                                                                                                                                                                                                                                                                                                                     |
| Angiotensin converting enzyme inhibitors | C09AA07, C09AA01, C09AA08, C09AA02, C09AA09, C09AA03, C09AA13, C09AA04, C09AA06, C09AA05, C09AA11, C09AA10                                                                                                                                                                                                                                                                                                                                                                                                                                                                                                                                                                                                                                                                                                                                                        |
| Angiotensin II antagonists               | C09CA06, C09CA02, C09CA04, C09CA01, C09CA07, C09CA03.                                                                                                                                                                                                                                                                                                                                                                                                                                                                                                                                                                                                                                                                                                                                                                                                             |
| Selective calcium channel blockers       | Dihydropyridine derivatives: C08CA01, C08CA02, C08CA03, C08CA09, C08CA13, C08CA04, C08CA05, C08CA10, C08CA07, C08CA08. Benzothiazepine derivatives: C08DB01. Phenylalkylamine derivatives: C08DA02, C08DA01.                                                                                                                                                                                                                                                                                                                                                                                                                                                                                                                                                                                                                                                      |
| Alpha-adrenoreceptor antagonists         | C02CA07, C02CA04, C02CA01, C02CA08.                                                                                                                                                                                                                                                                                                                                                                                                                                                                                                                                                                                                                                                                                                                                                                                                                               |
| Anti-SNS agents                          | C02AC01, C02CC07, C02AC02, C02AB01, C02AC05.                                                                                                                                                                                                                                                                                                                                                                                                                                                                                                                                                                                                                                                                                                                                                                                                                      |
| Arteriolar vasodilators                  | C04AX37, C02DB01, C02DC01.                                                                                                                                                                                                                                                                                                                                                                                                                                                                                                                                                                                                                                                                                                                                                                                                                                        |
| Other blood pressure lowering agents     | C03BX03.                                                                                                                                                                                                                                                                                                                                                                                                                                                                                                                                                                                                                                                                                                                                                                                                                                                          |
| Combination drugs                        | Diuretics and potassium-sparing agents: C03EA01, C03EA06, C03EA12, C03EA14, C03EA15, C03EA21, C03EA41, C03EB01, C03EB02, C03EB21. Beta blocking agents and diuretics: C07BA01, C07BA02, C07BA05, C07BA12, C07BA14, C07BA18, C07BB02, C07BB03, C07BB04, C07BB07, C07BG02, C07CA02, C07CA03, C07CA05, C07CA23, C07CB02, C07CB03, C07CB04, C07CB08, C07DA05, C07DB01. Loop diuretics and ACE inhibitors: C09BA01, C09BA02, C09BA03, C09BA04, C09BA05, C09BA06, C09BA07, C09BA08, C09BA09, C09BA13. Thiazides and angiotensin II antagonists: C09DA01, C09DA03, C09DA04, C09DA06, C09DA07. ACE inhibitors and calcium channel blockers: C09BB05, C09BB10. Calcium channel blockers and diuretics: C08GA01, C08GA02. Angiotensin II antagonists & Calcium channel blockers C09DB01, C09DB02, C09DB04. Angiotensin II antagonists, other combinations: C09DX01, C09DX03 |

|                                                           |                                                                                             |
|-----------------------------------------------------------|---------------------------------------------------------------------------------------------|
| <b>Lipid modifying agents</b>                             | HMG CoA reductase inhibitors: C10AA                                                         |
| <b>Anti-inflammatory OR immunosuppressant medications</b> |                                                                                             |
| Corticosteroids for systemic use                          | H02 (all)                                                                                   |
| Antiinflammatory and antirheumatic products               | Non-steroids: M01A (all). In combination with corticosteroids: M01BA                        |
| Hormone replacement therapy                               | Estrogens: G03C. Progestogens G03D. Progestogens and estrogens in combination G03FA, G03FB. |
| Aspirin                                                   | B01AC06                                                                                     |
